# Supplementary material for: Revision with Locking Compression Plate by Compression Technique for Diaphyseal Nonunions of the Femur and the Tibia: A Retrospective Study of 54 Cases
Source: Biomed Res Int. 2021 Jul 14;2021:9905067. doi: 10.1155/2021/9905067 (PMC8346318; doi:10.1155/2021/9905067)
Supplement: Supplementary Materials — Supplementary Table 1 and Supplementary Table 2 contain the general information of each case in the aseptic and septic groups, respectively. [file 9905067.f1.zip]

Archive with 2 entries (2 files):
- supplementary table 1.pdf
- supplementary table 2.pdf
