# Supplementary material for: Revision with Locking Compression Plate by Compression Technique for Diaphyseal Nonunions of the Femur and the Tibia: A Retrospective Study of 54 Cases
Source: Biomed Res Int. 2021 Jul 14;2021:9905067. doi: 10.1155/2021/9905067 (PMC8346318; doi:10.1155/2021/9905067)
Supplement: Supplementary Materials — Supplementary Table 1 and Supplementary Table 2 contain the general information of each case in the aseptic and septic groups, respectively. [file 9905067.f1.zip › supplementary table 1.pdf]

**Supplementary Table 1.** The general information of patients with aseptic nonunions.

| Case | Age | Gender | Location            | AO/OTA | GA        | Previous treatment | Smoker | Comorbidities      | Problems related to nonunion on imaging   | No. previous revisions | Web & Cech  | Duration of nonunion (months) | Bone grafting | Healing | Time to union (months) |
|------|-----|--------|---------------------|--------|-----------|--------------------|--------|--------------------|-------------------------------------------|------------------------|-------------|-------------------------------|---------------|---------|------------------------|
| 1    | 29  | F      | Femur shaft, middle | 32B    | Close     | IMN, wire          | No     | None               | Inappropriate fixation                    | 0                      | Hypertrophy | 14                            | ICBG          | Yes     | 6                      |
| 2    | 49  | M      | Tibia shaft, middle | 42B    | Close     | IMN                | Yes    | None               | Inappropriate fixation, poor bone contact | 0                      | Oligotrophy | 13                            | PRP           | Yes     | 8                      |
| 3    | 35  | M      | Femur shaft, middle | 32A    | Close     | IMN                | Yes    | None               | Inappropriate fixation                    | 0                      | Oligotrophy | 15                            | ICBG          | Yes     | 6                      |
| 4    | 32  | F      | Femur shaft, middle | 32B    | Close     | IMN                | No     | None               | Inappropriate fixation                    | 0                      | Hypertrophy | 9                             | None          | Yes     | 8                      |
| 5    | 43  | M      | Femur shaft, middle | 32A    | Close     | Plate (DCP)        | No     | None               | Inappropriate fixation                    | 0                      | Oligotrophy | 15                            | None          | Yes     | 7                      |
| 6    | 21  | M      | Femur shaft, distal | 32A    | Close     | Plate (DCP)        | No     | None               | Inappropriate fixation                    | 0                      | Hypertrophy | 26                            | ICBG          | Yes     | 6                      |
| 7    | 35  | F      | Tibia shaft, middle | 42B    | Close     | IMN                | No     | Metabolic Syndrome | Inappropriate fixation                    | 0                      | Hypertrophy | 12                            | ICBG          | Yes     | 7                      |
| 8    | 35  | M      | Femur shaft, distal | 32A    | Open II   | IMN                | No     | None               | Inappropriate fixation                    | 0                      | Oligotrophy | 14                            | ICBG, DBM     | Yes     | 7                      |
| 9    | 33  | M      | Femur shaft, distal | 32A    | Close     | IMN                | No     | None               | Inappropriate fixation                    | 0                      | Oligotrophy | 23                            | ICBG          | Yes     | 6                      |
| 10   | 54  | M      | Tibia shaft, middle | 42B    | Open IIIb | Ex-fix             | No     | None               | Inappropriate fixation                    | 0                      | Atrophy     | 13                            | ICBG          | Yes     | 9                      |
| 11   | 54  | F      | Tibia shaft, distal | 42B    | Close     | IMN, wire          | No     | None               | Inappropriate fixation                    | 0                      | Hypertrophy | 14                            | None          | Yes     | 8                      |

|    |    |   |                          |     |       |                        |     |          |                                                               |   |             |    |           |     |    |
|----|----|---|--------------------------|-----|-------|------------------------|-----|----------|---------------------------------------------------------------|---|-------------|----|-----------|-----|----|
| 12 | 31 | M | Femur shaft,<br>middle   | 32B | Close | Plate<br>(DCP)         | No  | None     | Inappropriate fixation                                        | 0 | Hypertrophy | 19 | ICBG      | Yes | 6  |
| 13 | 61 | M | Tibia shaft,<br>middle   | 42A | Close | Plaster                | Yes | None     | Inappropriate fixation                                        | 0 | Oligotrophy | 12 | ICBG, DBM | Yes | 6  |
| 14 | 44 | M | Tibia shaft,<br>distal   | 42B | Close | Plate (LCP)            | No  | None     | Inappropriate fixation                                        | 0 | Hypertrophy | 11 | None      | Yes | 10 |
| 15 | 29 | F | Tibia shaft,<br>distal   | 42C | Close | Ex-fix                 | No  | None     | Inappropriate fixation,<br>Poor bone contact<br>(Bone defect) | 1 | Atrophy     | 11 | ICBG      | Yes | 7  |
| 16 | 40 | M | Tibia shaft,<br>middle   | 42C | Close | Ex-fix,<br>screw, wire | No  | None     | Inappropriate fixation,<br>Poor bone contact<br>(Bone defect) | 3 | Oligotrophy | 36 | FVFG      | Yes | 7  |
| 17 | 27 | M | Femur shaft,<br>proximal | 32B | Close | IMN, wire              | No  | None     | Inappropriate fixation                                        | 0 | Hypertrophy | 24 | ICBG      | Yes | 6  |
| 18 | 53 | F | Femur shaft,<br>distal   | 32B | Close | IMN                    | No  | Diabetes | Inappropriate fixation,<br>poor bone contact                  | 0 | Oligotrophy | 14 | DBM       | Yes | 11 |
| 19 | 47 | M | Tibia shaft,<br>distal   | 42C | Close | Plate (LCP)            | Yes | Diabetes | Inappropriate fixation                                        | 0 | Hypertrophy | 12 | ICBG      | Yes | 7  |
| 20 | 24 | M | Tibia shaft,<br>middle   | 42A | Close | IMN                    | No  | None     | Inappropriate fixation                                        | 0 | Oligotrophy | 16 | None      | Yes | 9  |
| 21 | 50 | M | Tibia shaft,<br>middle   | 42C | Close | Plate<br>(DCP)         | Yes | None     | Poor bone contact<br>(Bone defect)                            | 0 | Atrophy     | 13 | FVFG      | Yes | 10 |
| 22 | 24 | M | Tibia shaft,<br>proximal | 42C | Close | Ex-fix,<br>wire        | No  | None     | Inappropriate fixation                                        | 0 | Hypertrophy | 12 | None      | Yes | 9  |
| 23 | 13 | F | Femur shaft,<br>distal   | 32B | Close | Plate<br>(DCP)         | No  | None     | Inappropriate fixation                                        | 0 | Hypertrophy | 11 | None      | Yes | 6  |

|    |    |   |                          |     |         |                          |     |          |                                                               |   |             |    |      |     |    |
|----|----|---|--------------------------|-----|---------|--------------------------|-----|----------|---------------------------------------------------------------|---|-------------|----|------|-----|----|
| 24 | 45 | M | Tibia shaft,<br>distal   | 42B | Close   | Plate<br>(DCP)           | Yes | None     | Inappropriate fixation,<br>poor bone contact<br>(Bone defect) | 0 | Oligotrophy | 13 | ICBG | Yes | 11 |
| 25 | 45 | M | Femur shaft,<br>proximal | 32A | Close   | IMN, wire                | Yes | None     | Inappropriate fixation                                        | 0 | Hypertrophy | 18 | ICBG | Yes | 7  |
| 26 | 39 | M | Femur shaft,<br>distal   | 32C | Close   | Ex-fix                   | Yes | None     | Poor bone contact<br>(Bone defect)                            | 0 | Atrophy     | 12 | FVFG | Yes | 12 |
| 27 | 42 | M | Femur shaft,<br>distal   | 32C | Close   | Plate<br>(DCP)           | No  | Diabetes | Inappropriate fixation,<br>poor bone contact                  | 0 | Hypertrophy | 10 | ICBG | Yes | 9  |
| 28 | 55 | M | Femur shaft,<br>distal   | 32B | Close   | Plate<br>(DCP)           | Yes | None     | Inappropriate fixation                                        | 0 | Hypertrophy | 14 | None | Yes | 11 |
| 29 | 36 | M | Tibia shaft,<br>proximal | 42C | Close   | Plate<br>(DCP)           | No  | None     | Inappropriate fixation                                        | 0 | Oligotrophy | 9  | ICBG | Yes | 9  |
| 30 | 36 | M | Tibia shaft,<br>middle   | 42C | Open II | IMN                      | No  | None     | Inappropriate fixation                                        | 1 | Hypertrophy | 12 | None | Yes | 8  |
| 31 | 21 | M | Femur shaft,<br>distal   | 32A | Close   | IMN                      | No  | None     | Inappropriate fixation                                        | 0 | Hypertrophy | 9  | None | Yes | 6  |
| 32 | 31 | M | Tibia shaft,<br>middle   | 42A | Close   | IMN                      | No  | None     | Poor bone contact                                             | 0 | Oligotrophy | 11 | None | Yes | 8  |
| 33 | 49 | M | Femur shaft,<br>proximal | 32B | Close   | Plate<br>(DCP)           | Yes | None     | Inappropriate fixation                                        | 0 | Hypertrophy | 9  | None | Yes | 5  |
| 34 | 62 | F | Femur shaft,<br>distal   | 32C | Open II | Plate<br>(DCP),<br>Graft | No  | Diabetes | Inappropriate fixation                                        | 0 | Oligotrophy | 28 | DBM  | Yes | 9  |

|    |    |   |                          |     |       |                |     |          |                                              |   |             |    |      |     |    |
|----|----|---|--------------------------|-----|-------|----------------|-----|----------|----------------------------------------------|---|-------------|----|------|-----|----|
| 35 | 35 | M | Femur shaft,<br>middle   | 32C | Close | Plate<br>(DCP) | No  | None     | Inappropriate fixation,<br>poor bone contact | 1 | Hypertrophy | 12 | ICBG | Yes | 8  |
| 36 | 36 | F | Femur shaft,<br>middle   | 32A | Close | IMN            | No  | None     | Inappropriate fixation,<br>poor bone contact | 1 | Hypertrophy | 11 | ICBG | Yes | 7  |
| 37 | 49 | M | Femur shaft,<br>middle   | 32A | Close | Plate<br>(DCP) | Yes | None     | Inappropriate fixation                       | 1 | Hypertrophy | 16 | ICBG | Yes | 10 |
| 38 | 31 | F | Tibia shaft,<br>proximal | 42A | Close | Plate<br>(DCP) | No  | None     | Inappropriate fixation                       | 0 | Hypertrophy | 12 | None | Yes | 8  |
| 39 | 62 | F | Femur shaft,<br>distal   | 32A | Close | IMN            | No  | None     | Inappropriate fixation                       | 0 | Hypertrophy | 9  | None | Yes | 7  |
| 40 | 56 | F | Femur shaft,<br>distal   | 32C | Close | Plate<br>(DCP) | No  | None     | Poor bone contact,<br>(Bone defect)          | 0 | Atrophy     | 12 | FVFG | Yes | 10 |
| 41 | 45 | M | Femur shaft,<br>distal   | 32C | Close | Plate<br>(DCP) | No  | None     | Inappropriate fixation,<br>poor bone contact | 0 | Hypertrophy | 11 | None | Yes | 7  |
| 42 | 55 | M | Femur shaft,<br>middle   | 32B | Close | IMN            | Yes | None     | Inappropriate fixation                       | 1 | Hypertrophy | 12 | ICBG | Yes | 6  |
| 43 | 35 | M | Femur shaft,<br>proximal | 32B | Close | IMN, wire      | No  | None     | Inappropriate fixation                       | 0 | Hypertrophy | 12 | None | Yes | 9  |
| 44 | 49 | F | Femur shaft,<br>proximal | 32C | Close | IMN, wire      | No  | None     | Poor bone contact                            | 4 | Hypertrophy | 36 | ICBG | Yes | 10 |
| 45 | 48 | M | Femur shaft,<br>distal   | 32C | Close | IMN            | Yes | None     | Inappropriate fixation                       | 0 | Oligotrophy | 12 | ICBG | Yes | 15 |
| 46 | 70 | M | Tibia shaft,<br>proximal | 42C | Close | Plate (LCP)    | Yes | Diabetes | Inappropriate fixation                       | 0 | Hypertrophy | 12 | ICBG | Yes | 17 |
