# Supplementary material for: Revision with Locking Compression Plate by Compression Technique for Diaphyseal Nonunions of the Femur and the Tibia: A Retrospective Study of 54 Cases
Source: Biomed Res Int. 2021 Jul 14;2021:9905067. doi: 10.1155/2021/9905067 (PMC8346318; doi:10.1155/2021/9905067)
Supplement: Supplementary Materials — Supplementary Table 1 and Supplementary Table 2 contain the general information of each case in the aseptic and septic groups, respectively. [file 9905067.f1.zip › supplementary table 2.pdf]

**Supplementary Table 2.** The general information of patients with septic nonunions.

| Case | Age | Gender | Location            | AO/OTA | GA        | Previous treatment | Smoker | Comorbiditeis | Problems                                  | No. previous revisions | Web & Cech  | Duration of nonunion (month) | Organisms             | Draining | Bone grafts | Healing | Time to union (month) |
|------|-----|--------|---------------------|--------|-----------|--------------------|--------|---------------|-------------------------------------------|------------------------|-------------|------------------------------|-----------------------|----------|-------------|---------|-----------------------|
| 1    | 44  | M      | Tibia shaft, distal | 42C    | Close     | Plate              | Yes    | None          | Inappropriate fixation                    | 2                      | Atrophy     | 16                           | Staphylococcus aureus | Yes      | ICBG        | Yes     | 12                    |
| 2    | 20  | M      | Tibia shaft, middle | 42C    | Open II   | Plate              | No     | None          | Poor bone contact                         | 2                      | Atrophy     | 12                           | Staphylococcus aureus | Yes      | ICBG        | Yes     | 10                    |
| 3    | 41  | F      | Femur shaft, distal | 32B    | Close     | Plate & IMN        | No     | None          | Inappropriate fixation, poor bone contact | 2                      | Hypertrophy | 27                           | Klebsiella            | Yes      | FVFG        | Yes     | 10                    |
| 4    | 32  | M      | Tibia shaft, middle | 42B    | Open IIIa | IMN                | No     | None          | Inappropriate fixation                    | 2                      | Atrophy     | 14                           | Staphylococcus aureus | Yes      | ICBG        | Yes     | 7                     |
| 5    | 21  | M      | Tibia shaft, middle | 42C    | Open IIIb | Ex-fix             | No     | None          | Poor bone contact                         | 2                      | Atrophy     | 10                           | Staphylococcus aureus | Yes      | FVFG        | Yes     | 8                     |
| 6    | 15  | M      | Tibia shaft, middle | 42C    | Close     | Ex-fix             | No     | None          | Poor bone contact                         | 6                      | Atrophy     | 21                           | Enterococcus faecalis | Yes      | FVFG        | Yes     | 12                    |
| 7    | 31  | M      | Femur shaft, middle | 32B    | Close     | IMN                | No     | None          | Poor bone contact                         | 2                      | Atrophy     | 18                           | Staphylococcus aureus | No       | FVFG        | Yes     | 11                    |
| 8    | 42  | M      | Tibia shaft, distal | 42C    | Open II   | Plate              | Yes    | None          | Inappropriate fixation, poor bone contact | 2                      | Atrophy     | 12                           | Staphylococcus aureus | No       | FVFG        | Yes     | 12                    |
